# Supplementary material
Source: PubMed Central journal article supplement (PMC6759292)

**Supplemental Figure 1: Bacterial burden in nasal passages following vaccination.**

Bacterial count in whole nasal passages 24 hours post challenge with (A) 19F/x, (B) 7F/x, (C) MNZ67 or (D) 72 hours post challenge with NTHi in vaccinated animals. each data point represents one animal, bar is median. p values calculated by Mann-Whitney. n.s. =not significant ( $p>0.05$ ).

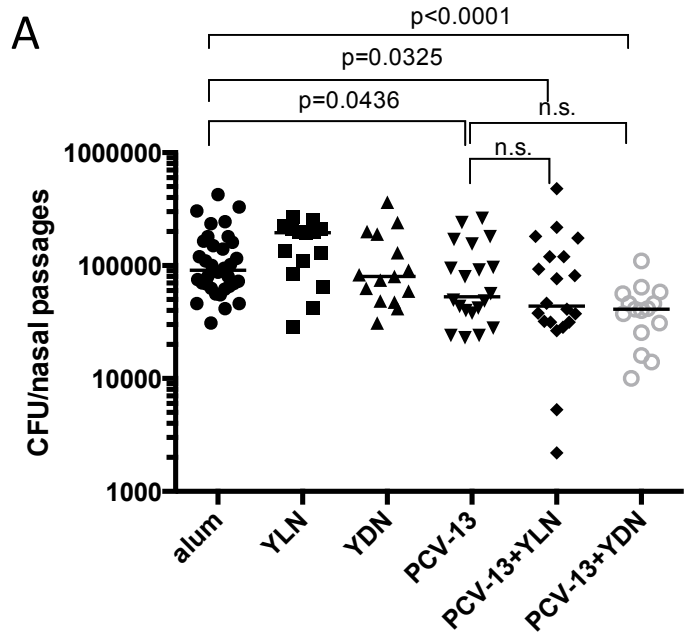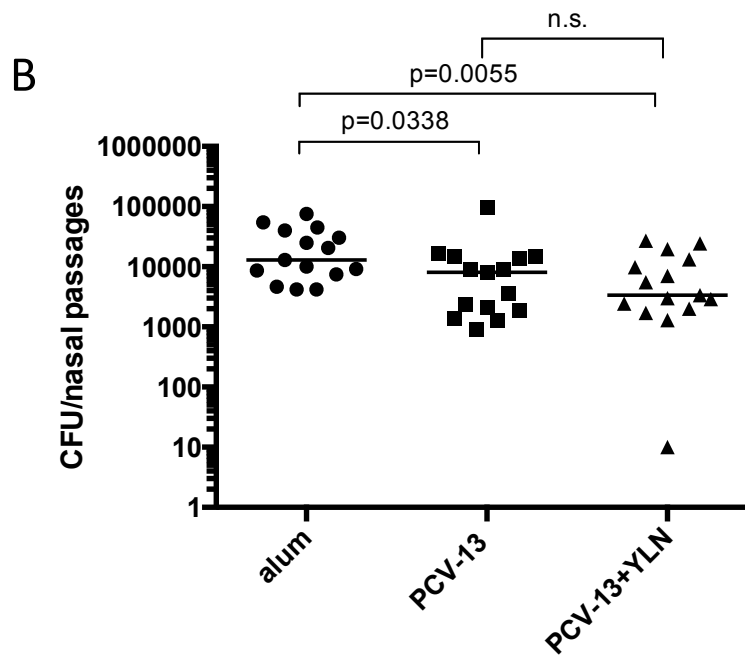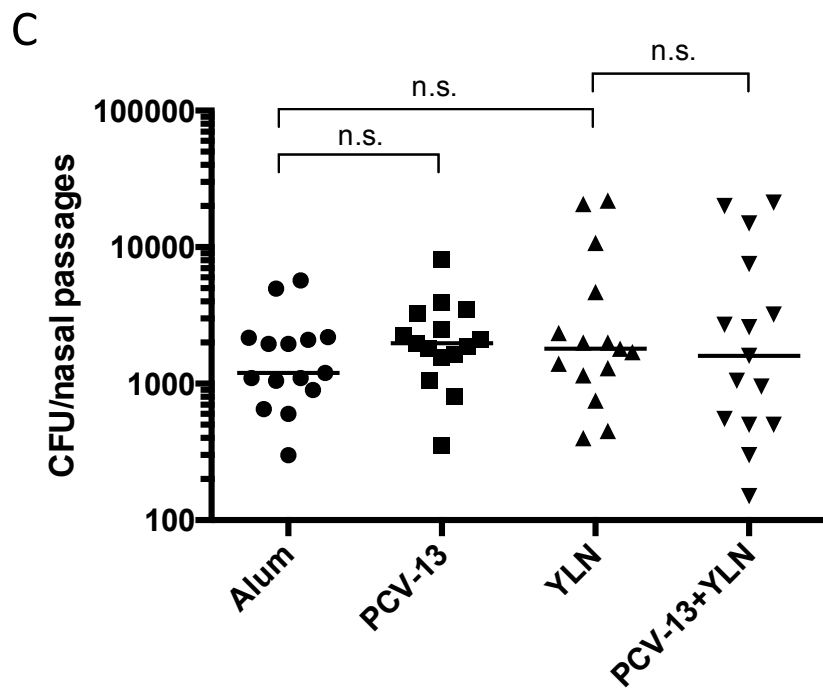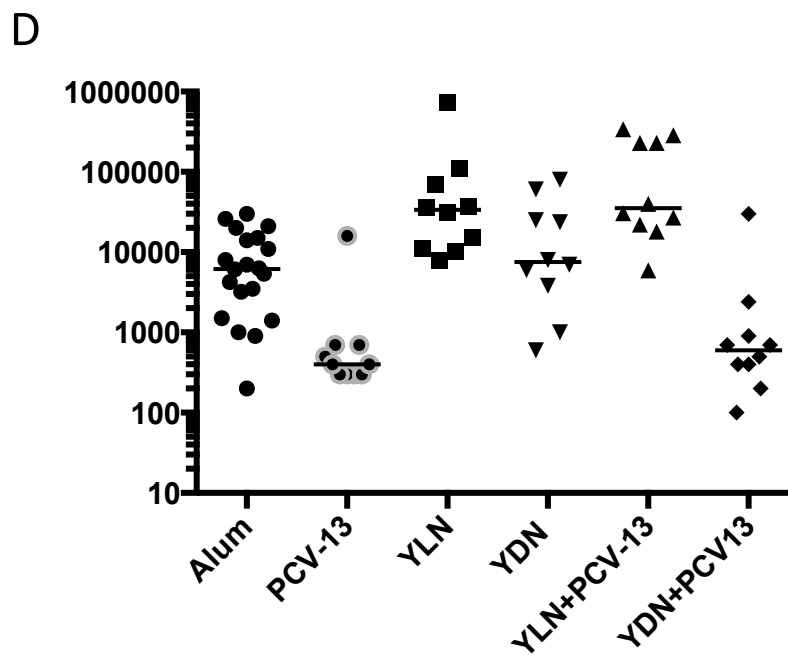

Supplement: IAI.00253-19-s0001.pdf [file IAI.00253-19-s0001.pdf]
